# Supplementary material
Source: Copernicus journal article supplement (doi:10.5194/gmd-19-5363-2026)
Supplement: Supplementary file 1 [file gmd-19-5363-2026-supplement.pdf]

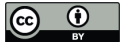

*Supplement of*

## **Ecosystem climate sensitivities drive the divergence in aerosol-induced carbon uptake across CMIP6 models**

**Zhaoyang Zhang et al.**

*Correspondence to:* Meng Fan ([fanmeng@aircas.ac.cn](mailto:fanmeng@aircas.ac.cn))

The copyright of individual parts of the supplement might differ from the article licence.

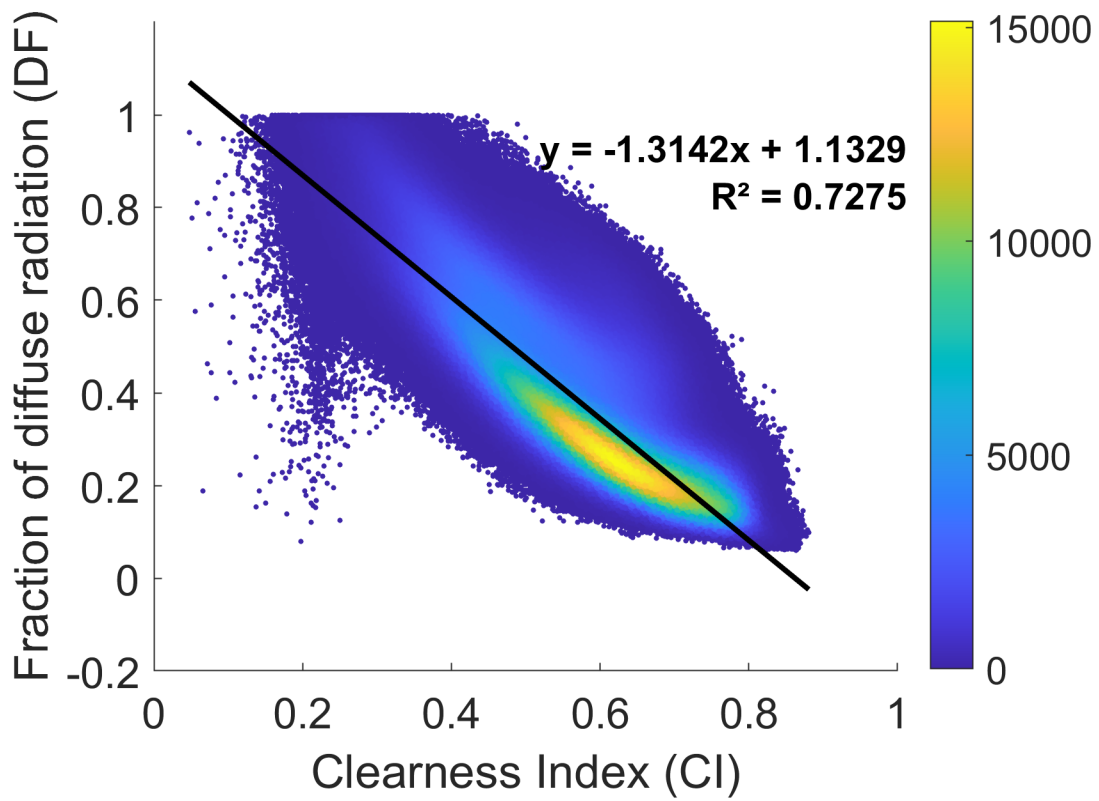

14

15 Figure S1. The scatter plots of fraction of diffuse radiation (DF) against the clearness index (CI)

16 from NorESM2-LM and UKESM1-0-LL.

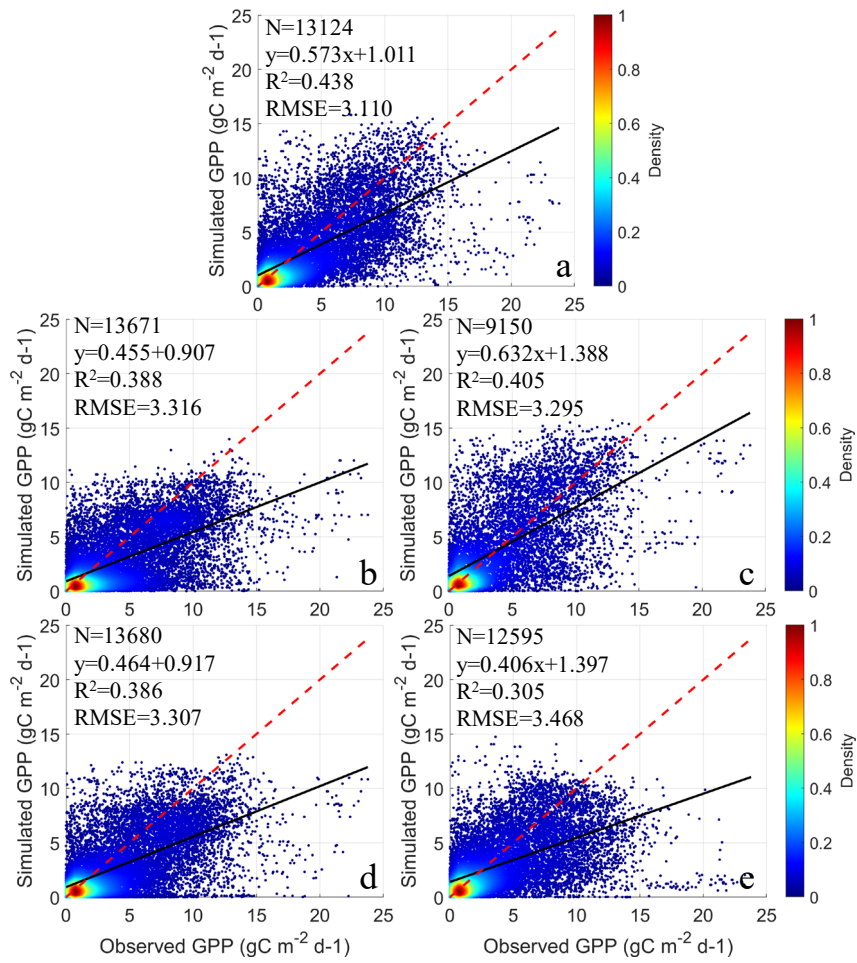

17

18 Figure S2. The scatter plots of simulated monthly GPP from CMIP6 models (a. BCC-ESM1, b. IPSL-

19 CM6A-LR, c. MPI-ESM-1-2-HAM, d. NorESM2-LM, e. UKESM1-0-LL) against observed GPP from

20 FLUXNET sites.

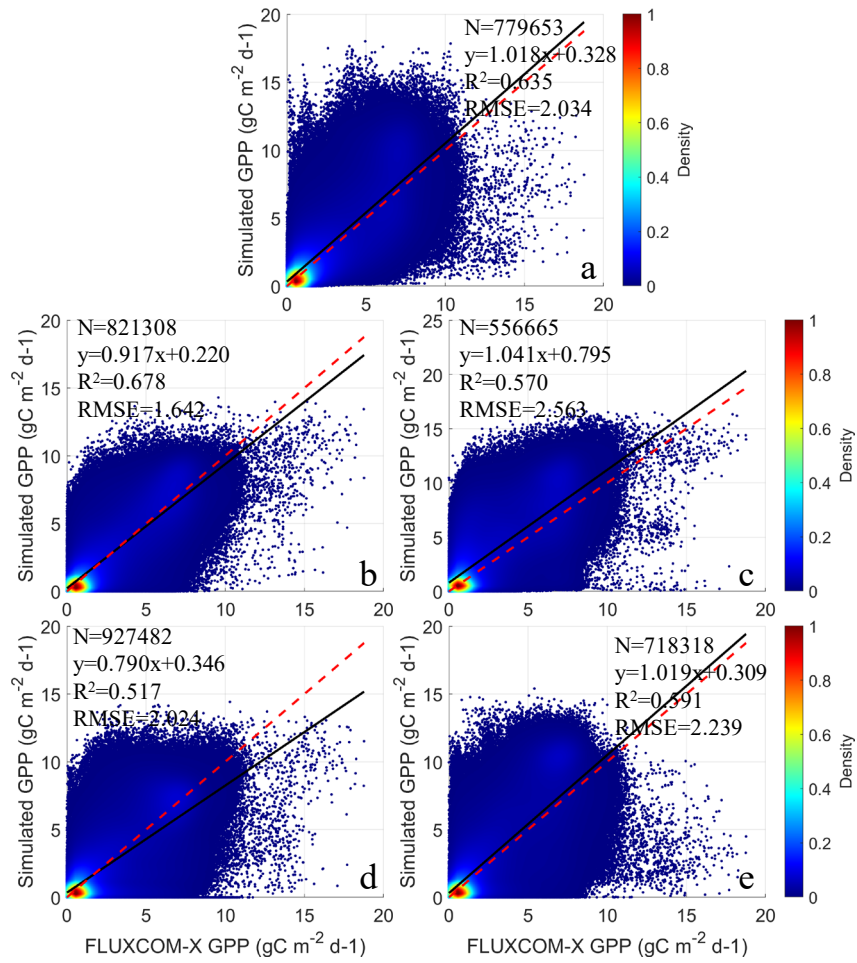

21

22 Figure S3. The scatter plots of simulated monthly GPP from CMIP6 models (a. BCC-ESM1, b. IPSL-

23 CM6A-LR, c. MPI-ESM1-2-HAM, d. NorESM2-LM, e. UKESM1-0-LL) against GPP from

24 FLUXCOM-X.

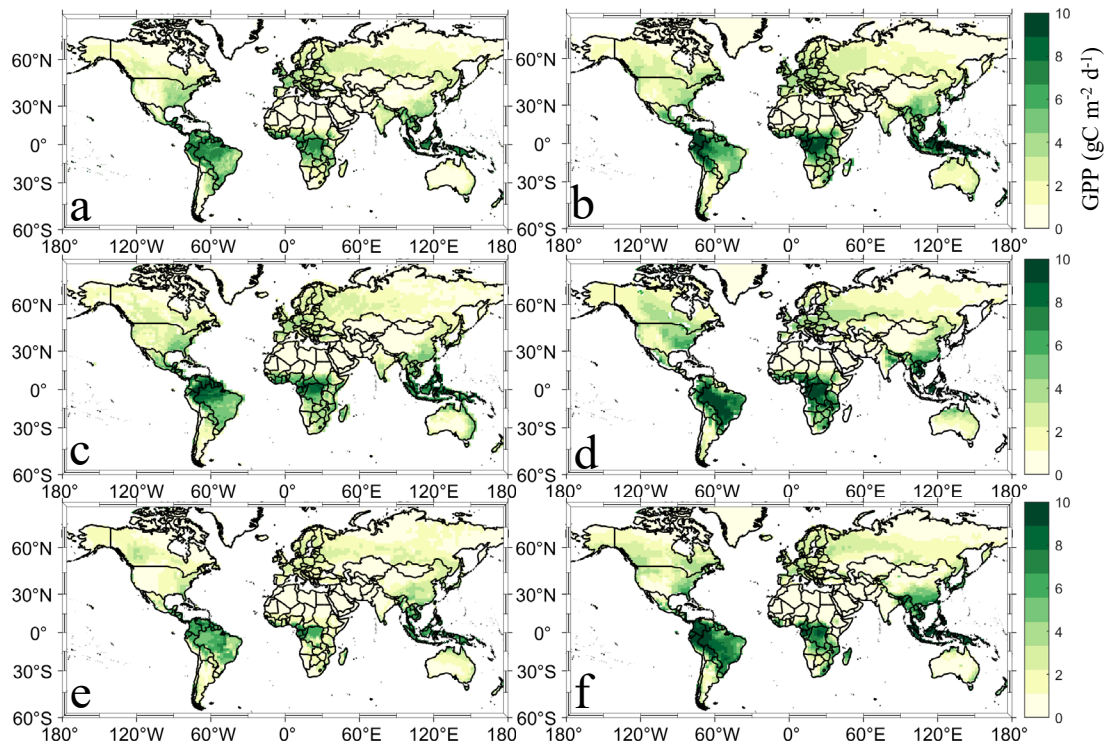

25

26 Figure S4. The spatial distribution of observed and simulated GPP from 2001 to 2014 (a. FLUXCOM-

27 X, b. BCC-ESM1, c. IPSL-CM6A-LR, d. MPI-ESM-1-2-HAM, e. NorESM2-LM, f. UKESM1-0-LL).

28

29

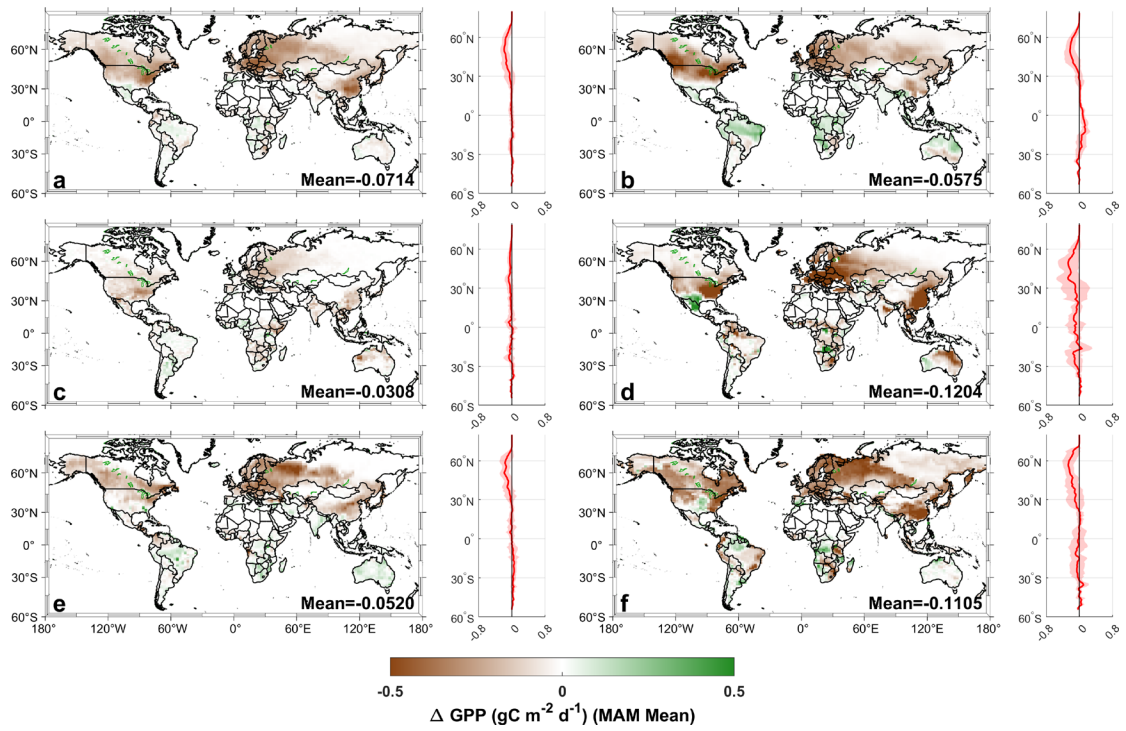

30

31 Figure S5. The spatial pattern of changes in ecosystem GPP induced by aerosols from CMIP6 models (a.

32 multi-model mean, b. BCC-ESM1, c. IPSL-CM6A-LR, d. MPI-ESM-1-2-HAM, e. NorESM2-LM, f.

33 UKESM1-0-LL) from March to May.

34

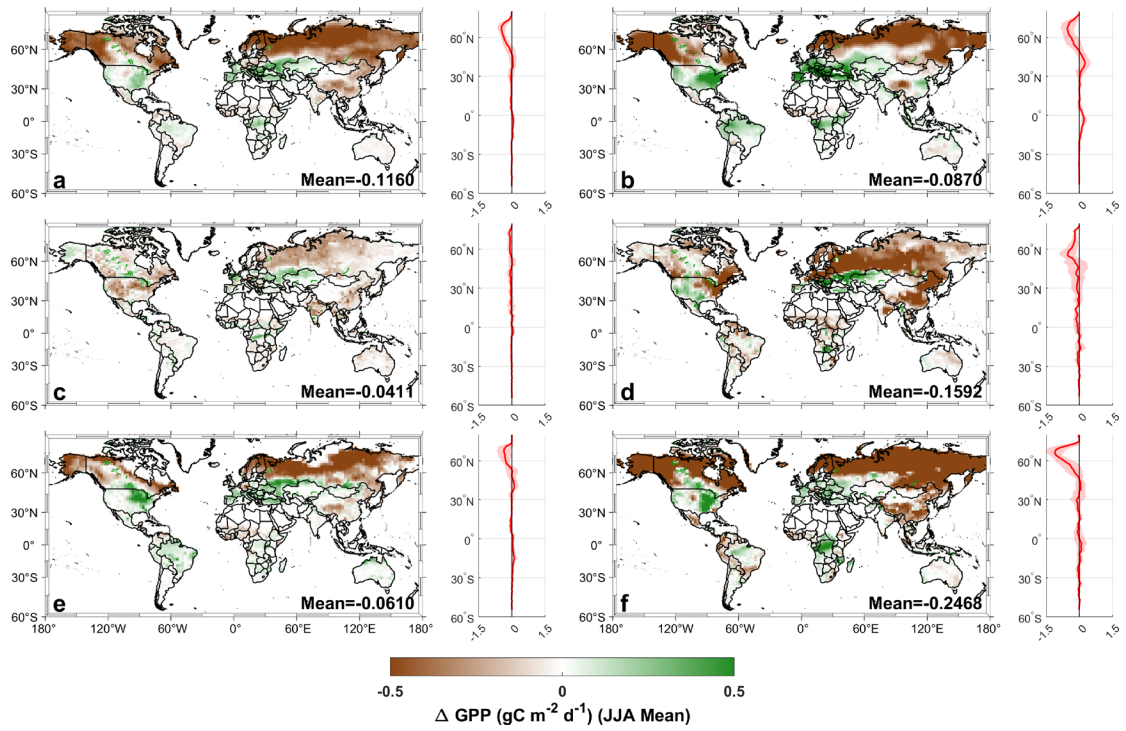

35

36 Figure S6. The spatial pattern of changes in ecosystem GPP induced by aerosols from CMIP6 models (a.

37 multi-model mean, b. BCC-ESM1, c. IPSL-CM6A-LR, d. MPI-ESM-1-2-HAM, e. NorESM2-LM, f.

38 UKESM1-0-LL) from June to August.

39

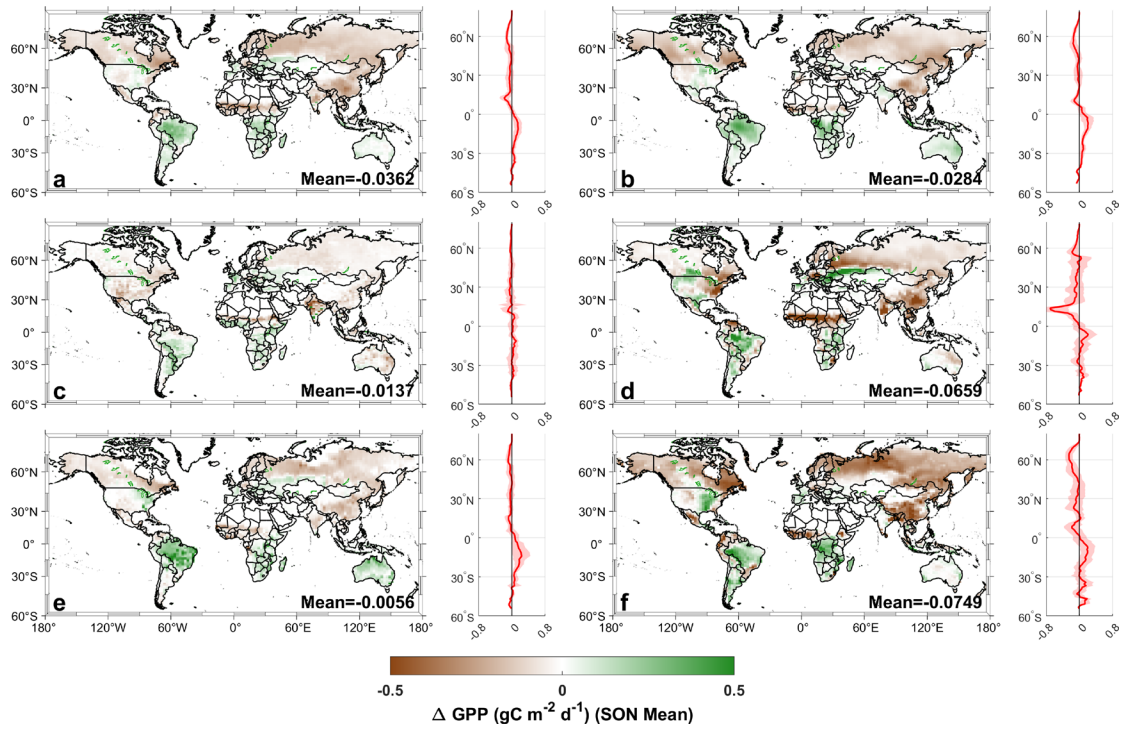

Figure S7. The spatial pattern of changes in ecosystem GPP induced by aerosols from CMIP6 models (a. multi-model mean, b. BCC-ESM1, c. IPSL-CM6A-LR, d. MPI-ESM-1-2-HAM, e. NorESM2-LM, f. UKESM1-0-LL) from September to November.

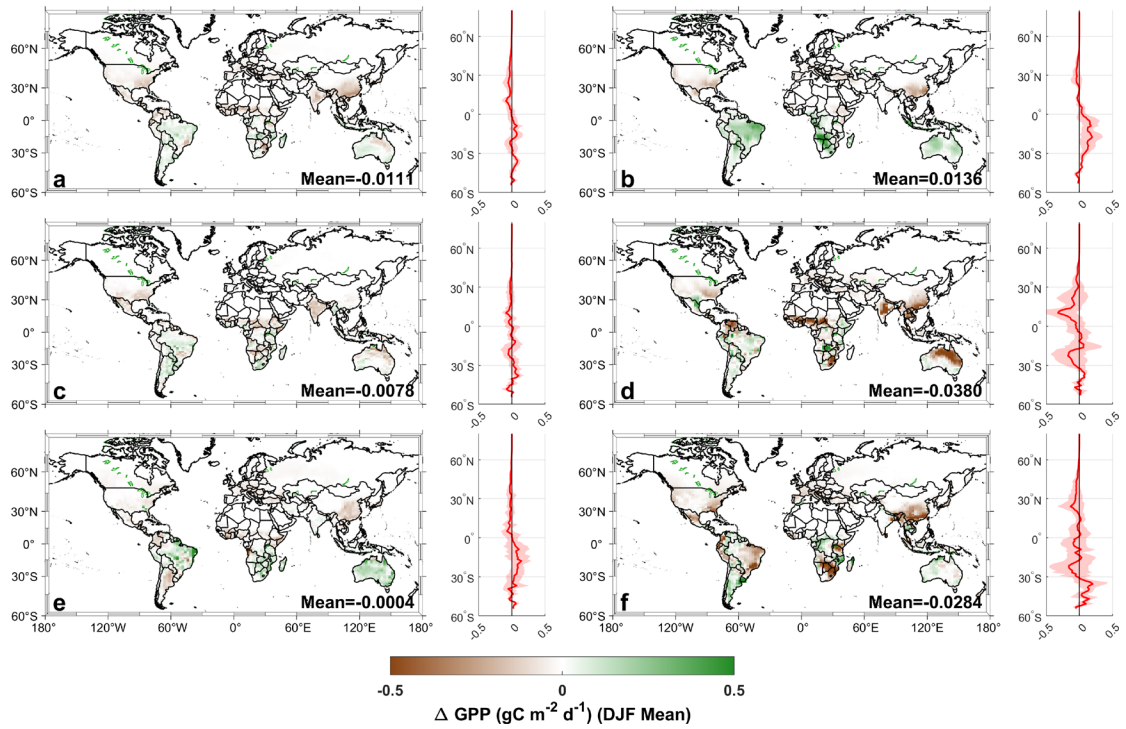

Figure S8. The spatial pattern of changes in ecosystem GPP induced by aerosols from CMIP6 models (a.

multi-model mean, b. BCC-ESM1, c. IPSL-CM6A-LR, d. MPI-ESM-1-2-HAM, e. NorESM2-LM, f.

UKESM1-0-LL) from December to February.

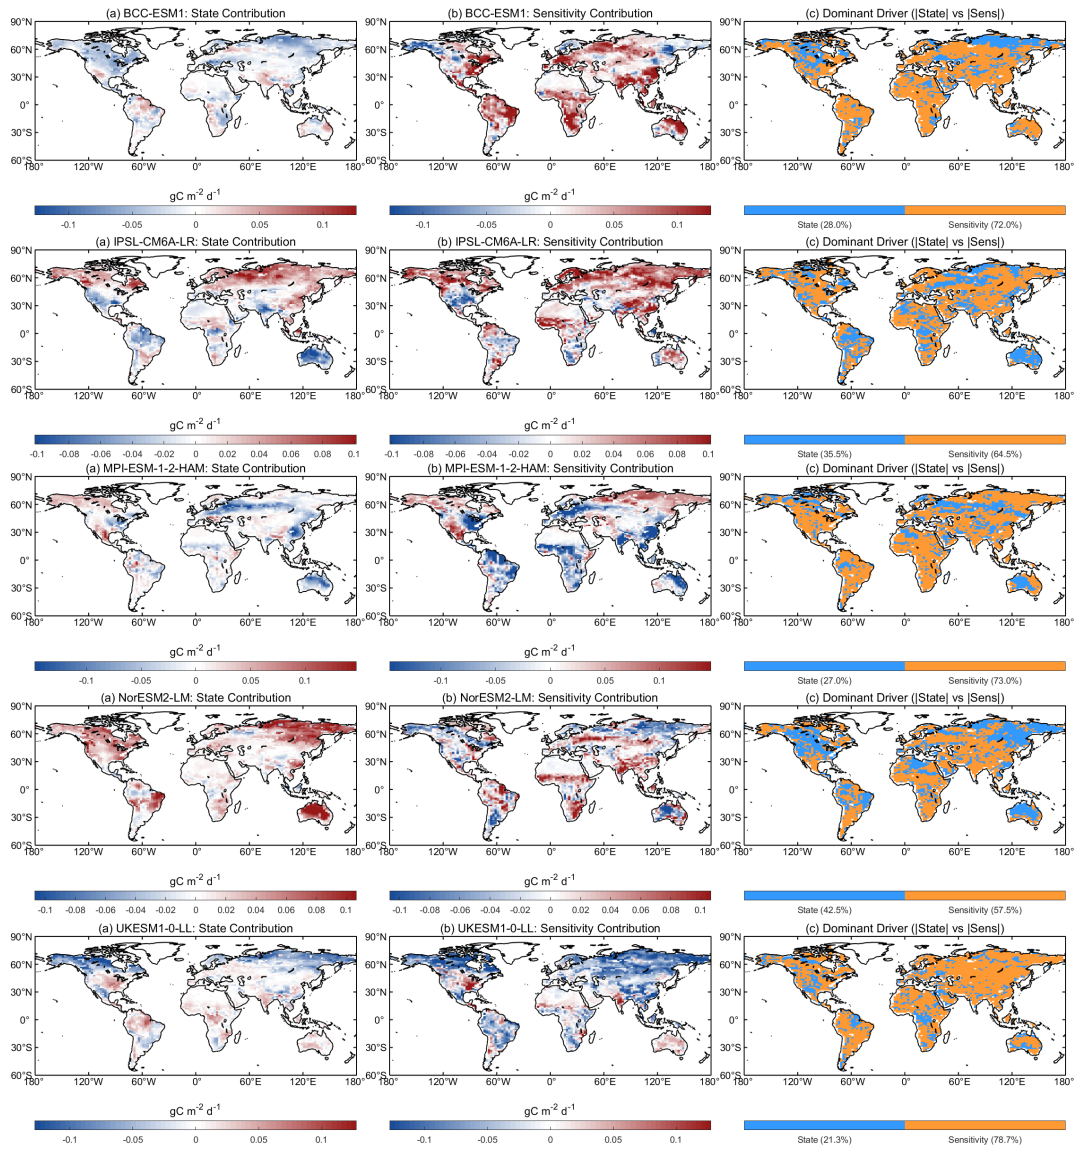

52

53 Figure S9. The spatial pattern of sensitivity contribution and state contribution and dominant driver

54 across Earth System Models (ESMs).

55

56 Table S1. Coefficient of determination ( $R^2$ ) of the multivariate attribution framework in reproducing  
 57 aerosol-induced GPP anomalies across Earth System Models per Plant Functional Type (PFT). ENF,  
 58 Evergreen Needleleaf Forest; EBF, Evergreen Broadleaf Forest; DBF, Deciduous Broadleaf Forest;  
 59 MF, Mixed Forest; OSH, Open Shrublands; WSA, Woody Savannas; SAV, Savannas; GRA,  
 60 Grasslands; WET, Wetlands; CRO, Croplands; BAR, Barren or Sparsely Vegetated.

| <b>PFT</b> | <b>BCC-<br/>ESM1</b> | <b>IPSL-<br/>CM6A-LR</b> | <b>MPI-ESM-<br/>1-2-HAM</b> | <b>NorESM2-<br/>LM</b> | <b>UKESM1-<br/>0-LL</b> |
|------------|----------------------|--------------------------|-----------------------------|------------------------|-------------------------|
| <b>ENF</b> | 0.836                | 0.851                    | 0.743                       | 0.961                  | 0.837                   |
| <b>EBF</b> | 0.686                | 0.692                    | 0.887                       | 0.906                  | 0.496                   |
| <b>DBF</b> | 0.949                | 0.979                    | 0.989                       | 0.906                  | 0.849                   |
| <b>MF</b>  | 0.660                | 0.729                    | 0.867                       | 0.901                  | 0.433                   |
| <b>OSH</b> | 0.880                | 0.811                    | 0.859                       | 0.764                  | 0.751                   |
| <b>WSA</b> | 0.779                | 0.830                    | 0.792                       | 0.870                  | 0.521                   |
| <b>SAV</b> | 0.807                | 0.786                    | 0.757                       | 0.787                  | 0.651                   |
| <b>GRA</b> | 0.682                | 0.804                    | 0.645                       | 0.814                  | 0.420                   |
| <b>WET</b> | 0.970                | 0.985                    | 0.842                       | 0.942                  | 0.973                   |
| <b>CRO</b> | 0.635                | 0.832                    | 0.853                       | 0.805                  | 0.496                   |
| <b>BAR</b> | 0.670                | 0.925                    | 0.778                       | 0.818                  | 0.611                   |

61  
 62  
 63  
 64  
 65

66 Table S2: Sensitivity Coefficients for Total Radiation ( $\beta_{PAR}$ ) per Plant Functional Type (PFT). ENF,  
67 Evergreen Needleleaf Forest; EBF, Evergreen Broadleaf Forest; DBF, Deciduous Broadleaf Forest;  
68 MF, Mixed Forest; OSH, Open Shrublands; WSA, Woody Savannas; SAV, Savannas; GRA,  
69 Grasslands; WET, Wetlands; CRO, Croplands; BAR, Barren or Sparsely Vegetated.

| <b>PFT</b> | <b>BCC-<br/>ESM1</b> | <b>IPSL-<br/>CM6A-LR</b> | <b>MPI-ESM-<br/>1-2-HAM</b> | <b>NorESM2-<br/>LM</b> | <b>UKESM1-<br/>0-LL</b> |
|------------|----------------------|--------------------------|-----------------------------|------------------------|-------------------------|
| <b>ENF</b> | 0.060004             | -0.009846                | 0.099274                    | 0.070613               | -0.000013               |
| <b>EBF</b> | 0.015620             | 0.041606                 | -0.087938                   | -0.037287              | -0.112900               |
| <b>DBF</b> | 0.024524             | 0.016964                 | 0.031943                    | 0.043793               | 0.054809                |
| <b>MF</b>  | 0.078144             | 0.017688                 | 0.085544                    | 0.042982               | 0.127988                |
| <b>OSH</b> | 0.029205             | 0.016505                 | 0.032895                    | 0.030918               | 0.067173                |
| <b>WSA</b> | 0.045420             | 0.002403                 | 0.075611                    | 0.032405               | 0.105841                |
| <b>SAV</b> | 0.043868             | 0.015162                 | 0.080874                    | 0.005151               | 0.114596                |
| <b>GRA</b> | 0.024818             | 0.001811                 | 0.045616                    | 0.010737               | 0.072748                |
| <b>WET</b> | 0.009624             | 0.013132                 | 0.052078                    | 0.021471               | 0.177116                |
| <b>CRO</b> | 0.017304             | -0.008540                | 0.066934                    | 0.020178               | 0.055000                |
| <b>BAR</b> | -0.003314            | 0.000968                 | 0.005285                    | 0.007699               | 0.046106                |

70

71

72

73

74 Table S3: Sensitivity Coefficients for Canopy Structure ( $\beta_{fPAR}$ ) per Plant Functional Type (PFT).  
 75 ENF, Evergreen Needleleaf Forest; EBF, Evergreen Broadleaf Forest; DBF, Deciduous Broadleaf  
 76 Forest; MF, Mixed Forest; OSH, Open Shrublands; WSA, Woody Savannas; SAV, Savannas; GRA,  
 77 Grasslands; WET, Wetlands; CRO, Croplands; BAR, Barren or Sparsely Vegetated.

| <b>PFT</b> | <b>BCC-<br/>ESM1</b> | <b>IPSL-<br/>CM6A-LR</b> | <b>MPI-ESM-<br/>1-2-HAM</b> | <b>NorESM2-<br/>LM</b> | <b>UKESM1-<br/>0-LL</b> |
|------------|----------------------|--------------------------|-----------------------------|------------------------|-------------------------|
| <b>ENF</b> | 0.114436             | 0.024338                 | 0.006533                    | 0.033213               | 0.061316                |
| <b>EBF</b> | 0.052473             | 0.075333                 | 0.032322                    | 0.057174               | 0.031813                |
| <b>DBF</b> | 0.078090             | 0.040978                 | 0.079064                    | 0.031206               | -0.045522               |
| <b>MF</b>  | 0.069046             | 0.031780                 | 0.029651                    | 0.035106               | 0.021965                |
| <b>OSH</b> | 0.038614             | 0.024632                 | 0.007610                    | 0.038204               | 0.012023                |
| <b>WSA</b> | 0.085676             | 0.026879                 | 0.023365                    | 0.029852               | 0.013253                |
| <b>SAV</b> | 0.051983             | 0.029588                 | 0.023297                    | 0.029316               | 0.026310                |
| <b>GRA</b> | 0.042318             | 0.025701                 | 0.010717                    | 0.023344               | 0.015249                |
| <b>WET</b> | 0.102288             | 0.031689                 | 0.046637                    | 0.031017               | 0.034506                |
| <b>CRO</b> | 0.030129             | 0.034112                 | 0.029883                    | 0.024567               | 0.007116                |
| <b>BAR</b> | 0.024839             | 0.021880                 | 0.004078                    | 0.010107               | 0.003583                |

78  
 79  
 80  
 81

82 Table S4: Sensitivity Coefficients for Temperature ( $\beta_{Tas}$ ) per Plant Functional Type (PFT). ENF,  
83 Evergreen Needleleaf Forest; EBF, Evergreen Broadleaf Forest; DBF, Deciduous Broadleaf Forest;  
84 MF, Mixed Forest; OSH, Open Shrublands; WSA, Woody Savannas; SAV, Savannas; GRA,  
85 Grasslands; WET, Wetlands; CRO, Croplands; BAR, Barren or Sparsely Vegetated.

| <b>PFT</b> | <b>BCC-<br/>ESM1</b> | <b>IPSL-<br/>CM6A-LR</b> | <b>MPI-ESM-<br/>1-2-HAM</b> | <b>NorESM2-<br/>LM</b> | <b>UKESM1-<br/>0-LL</b> |
|------------|----------------------|--------------------------|-----------------------------|------------------------|-------------------------|
| <b>ENF</b> | -0.002190            | 0.000240                 | -0.001651                   | 0.000182               | 0.001585                |
| <b>EBF</b> | 0.001295             | -0.000456                | -0.003084                   | -0.000612              | -0.003118               |
| <b>DBF</b> | -0.000878            | -0.000147                | 0.000666                    | -0.000001              | 0.001457                |
| <b>MF</b>  | -0.000185            | -0.000032                | -0.001440                   | -0.000465              | -0.000310               |
| <b>OSH</b> | 0.000757             | 0.000585                 | 0.000048                    | -0.000117              | 0.000593                |
| <b>WSA</b> | -0.000888            | 0.000096                 | -0.000827                   | -0.000381              | 0.000434                |
| <b>SAV</b> | 0.000288             | 0.000038                 | -0.000311                   | -0.000540              | 0.001013                |
| <b>GRA</b> | -0.000190            | -0.000098                | -0.000280                   | -0.000139              | 0.000120                |
| <b>WET</b> | -0.000512            | -0.000598                | -0.000310                   | 0.000095               | 0.000603                |
| <b>CRO</b> | -0.000013            | 0.000312                 | -0.000921                   | -0.000161              | 0.000144                |
| <b>BAR</b> | 0.000048             | -0.000008                | 0.000094                    | -0.000016              | -0.000158               |

86

87

88

89

90 Table S5: Sensitivity Coefficients for Precipitation ( $\beta_{pr}$ ) per Plant Functional Type (PFT). ENF,  
 91 Evergreen Needleleaf Forest; EBF, Evergreen Broadleaf Forest; DBF, Deciduous Broadleaf Forest;  
 92 MF, Mixed Forest; OSH, Open Shrublands; WSA, Woody Savannas; SAV, Savannas; GRA,  
 93 Grasslands; WET, Wetlands; CRO, Croplands; BAR, Barren or Sparsely Vegetated.

| <b>PFT</b> | <b>BCC-<br/>ESM1</b> | <b>IPSL-<br/>CM6A-LR</b> | <b>MPI-ESM-<br/>1-2-HAM</b> | <b>NorESM2-<br/>LM</b> | <b>UKESM1-<br/>0-LL</b> |
|------------|----------------------|--------------------------|-----------------------------|------------------------|-------------------------|
| <b>ENF</b> | 6.2364               | -43.3238                 | 225.1848                    | -201.5129              | 603.2267                |
| <b>EBF</b> | 165.3611             | 65.0377                  | 109.1002                    | -6.1268                | 179.2539                |
| <b>DBF</b> | 235.2866             | 87.0353                  | 235.4413                    | 134.8818               | 554.0208                |
| <b>MF</b>  | 78.9363              | 69.4605                  | 178.7551                    | 5.2673                 | 439.8855                |
| <b>OSH</b> | -136.0682            | -21.2328                 | 409.4631                    | 70.6018                | 203.1865                |
| <b>WSA</b> | -12.3793             | 68.3307                  | 206.0095                    | -5.8931                | 444.5251                |
| <b>SAV</b> | -16.7918             | 13.2379                  | 260.7474                    | 59.1503                | 293.8231                |
| <b>GRA</b> | -61.7907             | 3.3118                   | 357.4310                    | 96.3369                | 264.5849                |
| <b>WET</b> | -178.3743            | -189.3849                | -268.0948                   | -20.6870               | 169.6031                |
| <b>CRO</b> | -23.3069             | -19.1447                 | 292.8703                    | 36.4451                | 376.3037                |
| <b>BAR</b> | -16.1049             | -14.4027                 | 257.5394                    | 81.6666                | 473.4937                |

94  
 95  
 96  
 97

98 Table S6: Sensitivity Coefficients for Clearness Index ( $\beta_{CI}$ ) per Plant Functional Type (PFT). ENF,  
 99 Evergreen Needleleaf Forest; EBF, Evergreen Broadleaf Forest; DBF, Deciduous Broadleaf Forest;  
 100 MF, Mixed Forest; OSH, Open Shrublands; WSA, Woody Savannas; SAV, Savannas; GRA,  
 101 Grasslands; WET, Wetlands; CRO, Croplands; BAR, Barren or Sparsely Vegetated.

| <b>PFT</b> | <b>BCC-<br/>ESM1</b> | <b>IPSL-<br/>CM6A-LR</b> | <b>MPI-ESM-<br/>1-2-HAM</b> | <b>NorESM2-<br/>LM</b> | <b>UKESM1-<br/>0-LL</b> |
|------------|----------------------|--------------------------|-----------------------------|------------------------|-------------------------|
| <b>ENF</b> | -0.179400            | -0.004691                | -0.133819                   | -0.159882              | -0.059526               |
| <b>EBF</b> | -0.034866            | -0.037444                | 0.212178                    | 0.068153               | 0.255530                |
| <b>DBF</b> | -0.065590            | -0.000442                | -0.043122                   | -0.085349              | -0.088917               |
| <b>MF</b>  | -0.197453            | -0.023796                | -0.122750                   | -0.081399              | -0.251073               |
| <b>OSH</b> | -0.096439            | -0.031949                | -0.068272                   | -0.044959              | -0.200439               |
| <b>WSA</b> | -0.131831            | 0.015233                 | -0.108264                   | -0.061041              | -0.223069               |
| <b>SAV</b> | -0.128428            | -0.013374                | -0.133998                   | 0.006582               | -0.227113               |
| <b>GRA</b> | -0.058220            | 0.003497                 | -0.069130                   | -0.008668              | -0.106475               |
| <b>WET</b> | -0.049906            | -0.059406                | -0.018018                   | -0.036812              | -0.294887               |
| <b>CRO</b> | -0.074630            | 0.012429                 | -0.095520                   | -0.043673              | -0.093012               |
| <b>BAR</b> | 0.002708             | -0.001309                | -0.007610                   | -0.007820              | -0.043406               |

102  
 103  
 104  
 105
